# Supplementary material for: Interfacial interaction induced OER activity of MOF derived superhydrophilic Co3O4–NiO hybrid nanostructures
Source: Royal Society of Chemistry journal article supplement (doi:10.1039/d1dt03810a), 2021-12-15
Supplement: d1dt03810a1.pdf [file d1dt03810a1.pdf]

# Electronic Supplementary Information

Interfacial interaction induced OER activity of  
MOF derived superhydrophilic  $\text{Co}_3\text{O}_4$ -NiO hybrid  
nanostructures

*Ashish Gaur,<sup>a</sup>Vikas Pundir,<sup>b</sup>Krishankant,<sup>b</sup>Ritu Rai,<sup>b</sup>Baljeet  
Kaur,<sup>b</sup>Takahiro Maruyama,<sup>b</sup>Chandan Bera,<sup>a</sup> and Vivek Bagchi<sup>\*a</sup>*

*<sup>a</sup>Institute of Nano Science and Technology (INST) Sector-81, Knowledge City, Sahibzada Ajit  
Singh Nagar, Punjab, Pin - 140306.*

*<sup>b</sup>Department of Applied Chemistry, Meijo University, 1-501 Shiogamaguchi, Tempaku,  
Nagoya 468-8502, Japan.*

\*Corresponding author: [vivekbagchi@gmail.com](mailto:vivekbagchi@gmail.com), [bagchiv@inst.ac.in](mailto:bagchiv@inst.ac.in)

## **S1. Experimental section**

**S2.1.PXRD spectra of  $\text{Co}_3\text{O}_4$  and bare NF**

**S2.2.PXRD spectra of MOF over NF**

**S3.1.SEM images of MOF over NF**

**S3.2. SEM images of NiO/NF**

**S4.TEM and HRTEM analysis of  $\text{Co}_3\text{O}_4$**

**S5.1.Comparison of the XPS peak position of Co 2p and Ni 2p in different catalysts.**

**S5.2.Wide scan XPS spectrum of  $\text{Co}_3\text{O}_4$**

**S5.3.High resolution XPS spectrum of Co 2p and O 1s of individual  $\text{Co}_3\text{O}_4$**

**S5.4. Deconvoluted peak parameters of the XPS analysis of  $\text{Co}_3\text{O}_4$ -NiO/NF**

**S5.5. Deconvoluted peak parameters of the XPS analysis of  $\text{Co}_3\text{O}_4$**

**S6.1. OER scheme showing the mechanism .**

**S6.2 Mass loading of all the catalysts over Nickel foam.**

**S6.3. LSV plot of  $\text{NiCo}_2\text{O}_4$ -NiO/NF and  $\text{Co}_3\text{O}_4$ -NiO/NF**

**S6.4 Comparative table of OER performance of recently reported  $\text{Co}_3\text{O}_4$  and NiO based electrocatalyst.**

**S6.5. ECSA normalized LSV curve of  $\text{Co}_3\text{O}_4$ -NiO/NF**

**S6.6. CV of all the catalysts for  $C_{dl}$  calculations**

**S6.7.PXRD spectra of the catalyst after durability test**

**S6.8.HRTEM analysis of catalyst after durability test**

**S6.9.STEM elemental mapping of catalyst after durability test**

## S6.10 XPS analysis of catalyst after stability

## S7. Theoretical studies

### S1 Experimental procedure

**Synthesis of Co<sub>3</sub>O<sub>4</sub>:** Co<sub>3</sub>O<sub>4</sub> nanoparticles were synthesized by using metal organic framework as a precursor (Co<sub>2</sub>(OH)<sub>2</sub>(BDC))The synthesis of MOF is done by using previously reported method [1] with slight modification in which 2 mmol of Co(NO<sub>3</sub>)<sub>2</sub>.6H<sub>2</sub>O, and 2 mmol of 1,4-benzenedicarboxylic acid (H<sub>2</sub>BDC). Firstly the 2 mmol of 1,4-benzenedicarboxylic acid (H<sub>2</sub>BDC) were dissolve in 10 mL of N,N-dimethylformamide (DMF) then 1 mL of 0.5 M NaOH solution was added under continuous stirring. In other flask 2 mmol of Co(NO<sub>3</sub>)<sub>2</sub>.6H<sub>2</sub>O were dissolve in 10 mL of N,N-dimethylformamide (DMF). Both the solutions were mixed together in the 50 mL Teflon-lined stainless steel autoclave and the autoclave was heated was heated for 20 h at 110°C temperature. The as obtained Co<sub>2</sub>(OH)<sub>2</sub>(BDC) MOF was washed three times with DMF and ethanol and dried naturally. The as obtained MOF was heated in furnace at 500°C for 3 hr at a ramp rate of 5°C/min. After annealing Co<sub>3</sub>O<sub>4</sub> were obtained and used as it is.

**Synthesis of NiO/NF:** The NiO/NF electrode was obtained by heating the bare nickel foam at 500°C for 3 hr at a ramp rate of 5°C /min. After annealing the NiO nanostructures were formed over nickel foam.

### S2.1. PXRD spectra of $\text{Co}_3\text{O}_4$ and bare NF

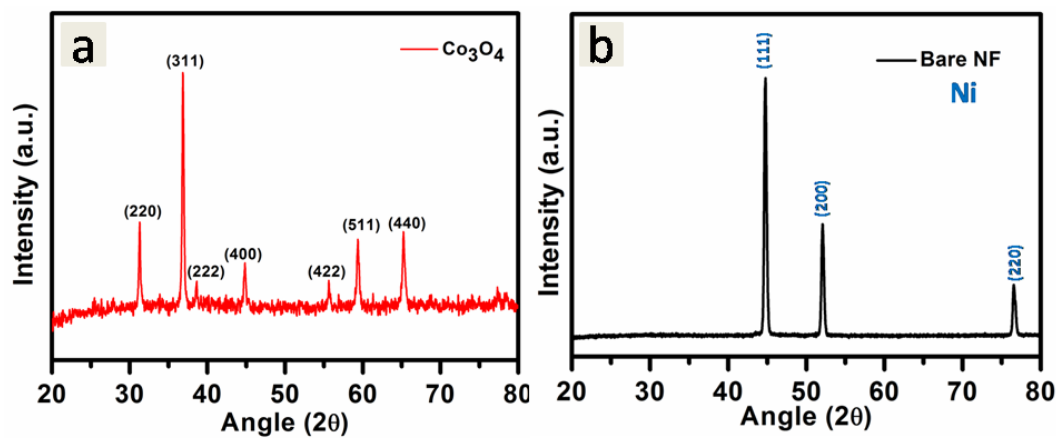

**Figure S1** PXRD spectrum of  $\text{Co}_3\text{O}_4$  (a) and NiO/NF (b) showing the presence of all the respective peaks

The XRD pattern was obtained in the  $2\theta$  angular region of  $20^\circ$  to  $80^\circ$  with an increment of 0.00190/Step.

### S2.2. PXRD spectra of MOF over NF

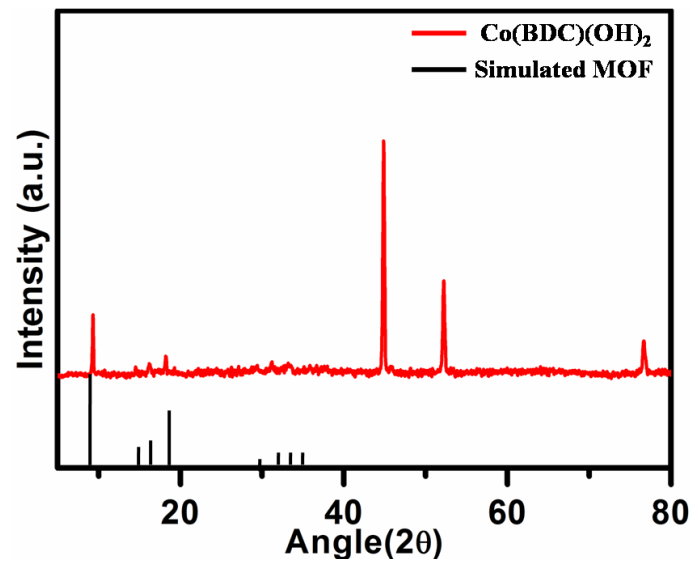

Figure S2 PXR spectra of MOF over NF overlapped with the simulated MOF

### S3.1. SEM images of MOF over NF

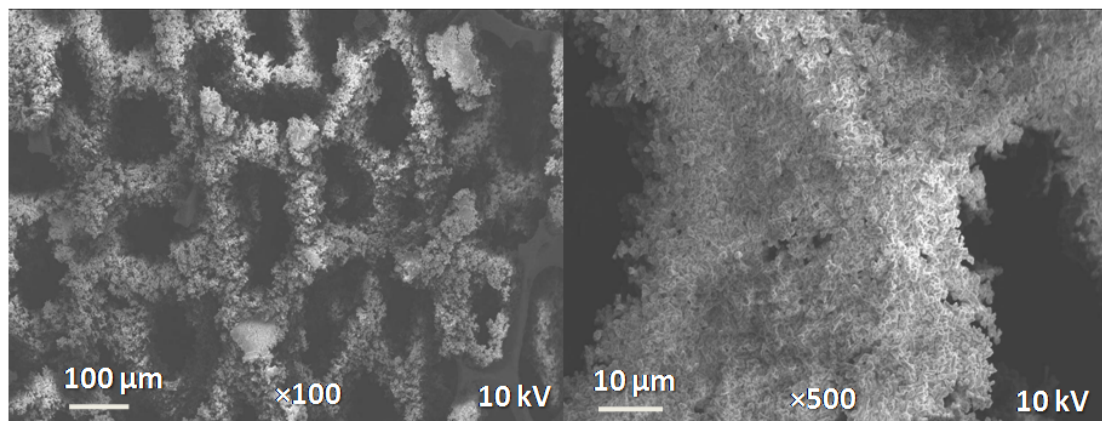

Figure S3. SEM images of MOF over NF

### S3.2. SEM images of NiO over NF

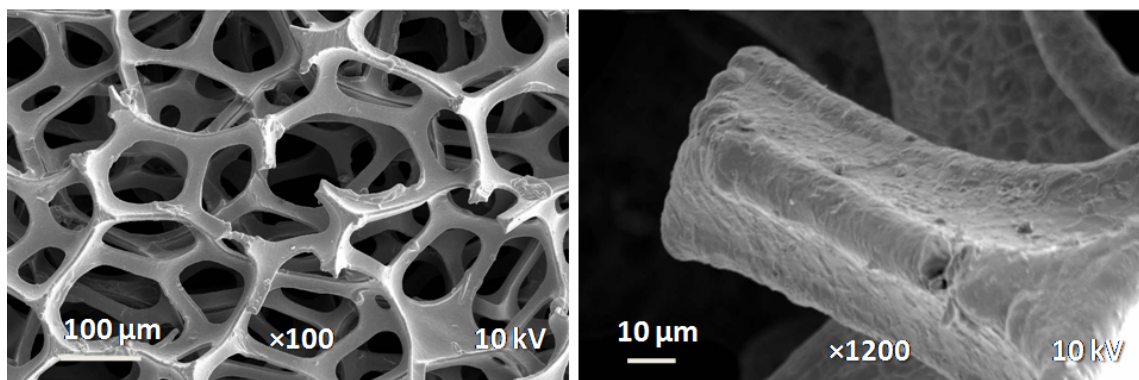

**Figure S4.** SEM images of NiO formed over NF at different magnification

#### S4. TEM and HRTEM images of $\text{Co}_3\text{O}_4$ nanoparticles

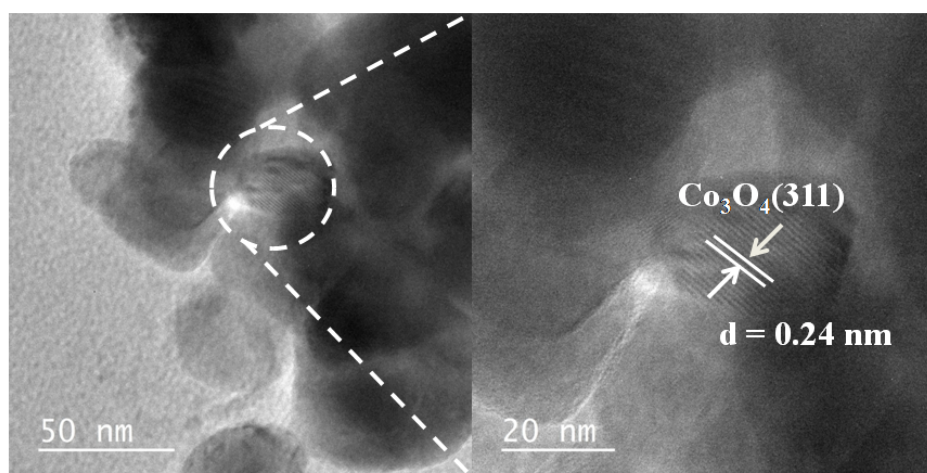

**Figure S5.** (a) TEM and (b) HRTEM images of individual  $\text{Co}_3\text{O}_4$  nanoparticles with the corresponding plane and d spacing value

### S5.1. Comparison of the XPS peak position of Co 2p and Ni 2p in different catalysts.

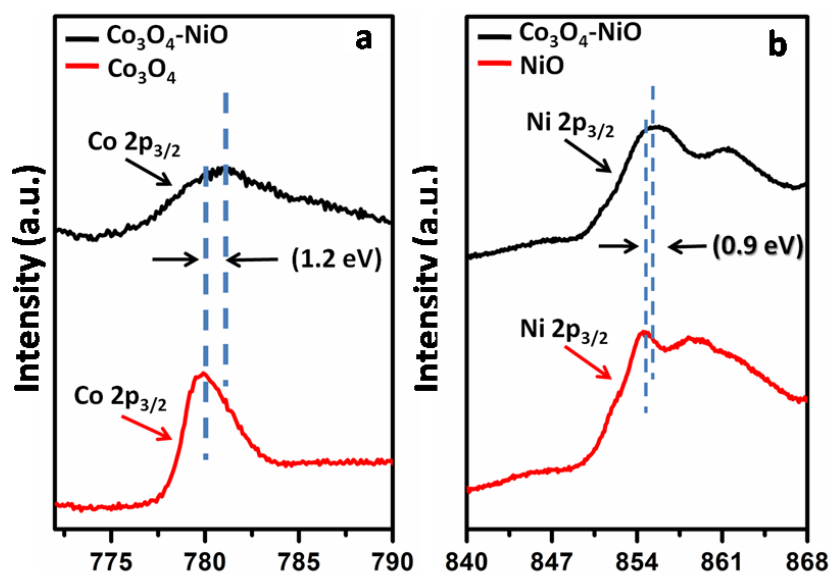

**Figure S6** (a) High resolution Co 2p<sub>3/2</sub> XPS spectra of Co<sub>3</sub>O<sub>4</sub>-NiO and Co<sub>3</sub>O<sub>4</sub> (b) high resolution XPS Ni 2p spectra of Co<sub>3</sub>O<sub>4</sub>-NiO and NiO

### S5.2 Wide scan XPS spectra of Co<sub>3</sub>O<sub>4</sub>

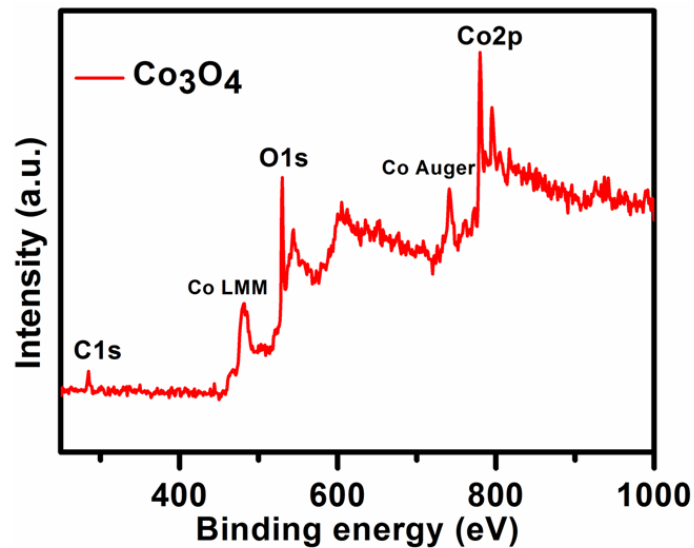

**Figure S7** Wide scan XPS spectra of individual Co<sub>3</sub>O<sub>4</sub>.

### S5.3. XPS spectra of Co<sub>3</sub>O<sub>4</sub>

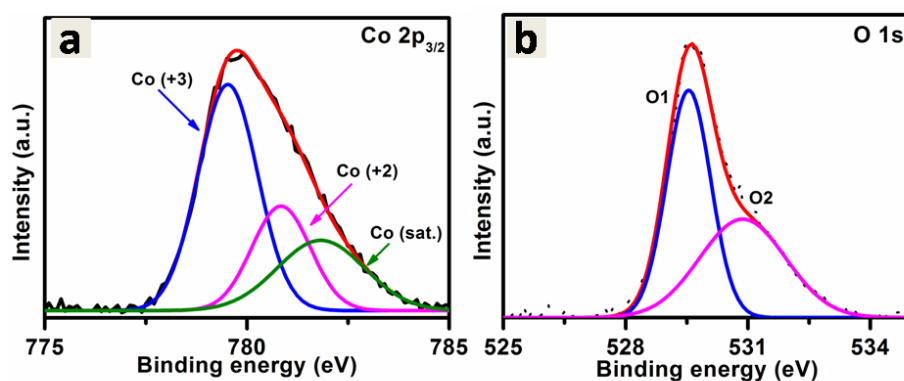

**Figure S8** (a)High resolution XPS spectra of Co2p present in Co<sub>3</sub>O<sub>4</sub>(b)The deconvoluted XPS spectra of O1s present in Co<sub>3</sub>O<sub>4</sub>

**S5.4. Table containing the various parameters obtained after the deconvolution of XPS spectra of Co<sub>3</sub>O<sub>4</sub>-NiO/NF**

| Element | Peak             | BE (eV)       | FWHM       | Area (%)    |
|---------|------------------|---------------|------------|-------------|
| Co 2p   | Co <sup>3+</sup> | 779.6         | 2.04       | 52.49       |
|         | Co <sup>2+</sup> | 781.3         | 2.11       | 24.10       |
|         | Sat.             | 781.8         | 5.67       | 23.40       |
| Ni 2p   | Ni <sup>+2</sup> | 853.7 & 871.7 | 1.49 & 2.6 | 10.1 & 9.9  |
|         | Ni <sup>+3</sup> | 855.5 & 874.3 | 2.8 & 4.8  | 30.7 & 17.9 |
|         | Sat.             | 861.0         | 5.1        | 31.2        |
| O 1s    | O1               | 529.4         | 1.21       | 34.6        |
|         | O2               | 531.0         | 2.89       | 65.3        |

**Table S1**Table containing the deconvoluted peak parameters of Co<sub>3</sub>O<sub>4</sub>- NiO/NF obtained after the XPS analysis



S5.5. Table containing the various parameters obtained after the deconvolution of XPS spectra of  $\text{Co}_3\text{O}_4$

| Element | Peak             | BE (eV) | FWHM | Area (%) |
|---------|------------------|---------|------|----------|
| Co 2p   | $\text{Co}^{3+}$ | 778.8   | 1.72 | 52.33    |
|         | $\text{Co}^{2+}$ | 779.6   | 1.69 | 23.7     |
|         | Sat.             | 780.9   | 2.54 | 23.9     |
| O 1s    | O1               | 529.5   | 1.27 | 54.2     |
|         | O2               | 530.8   | 2.48 | 45.7     |

**Table S2** Table containing the deconvoluted peak parameters of  $\text{Co}_3\text{O}_4$  obtained after the XPS analysis

S6.1. Scheme showing mechanism for electrocatalytic oxygen evolution

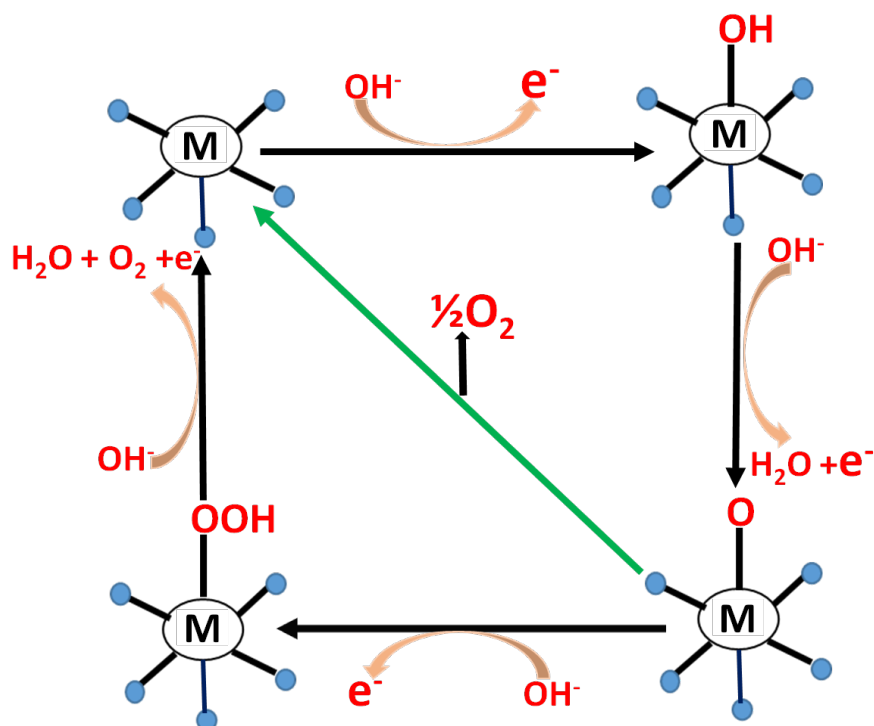

Figure S9 scheme showing the oxygen evolution reaction on metal center.

### S6.2. Mass loading of all the catalyst on nickel foam.

| Catalyst                              | Mass loading ( $\text{mg cm}^{-2}$ ) |
|---------------------------------------|--------------------------------------|
| $\text{Co}_3\text{O}_4\text{-NiO/NF}$ | 3.35                                 |
| $\text{Co}_3\text{O}_4\text{/NF}$     | 3.35                                 |
| $\text{NiO/NF}$                       | 1.4                                  |
| $\text{RuO}_2\text{/NF}$              | 3.35                                 |

Table S3 Mass loading of all the catalyst over NF

### S6.3. Comparison of OER activity of the $\text{NiCo}_2\text{O}_4\text{-NiO/NF}$ and $\text{Co}_3\text{O}_4\text{-NiO/NF}$

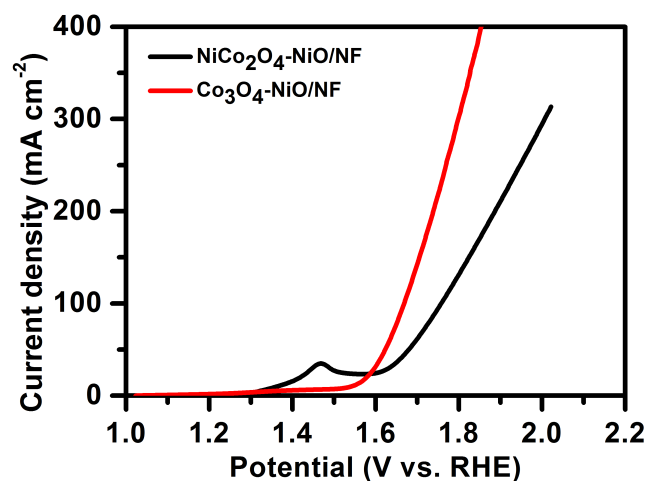

Figure S10 LSV curve of  $\text{NiCo}_2\text{O}_4\text{-NiO/NF}$  and  $\text{Co}_3\text{O}_4\text{-NiO/NF}$

**S6.4 Comparative table of the electrochemical activity of previously reported Co<sub>3</sub>O<sub>4</sub> and NiO based catalyst**

| Material                                                                           | Electrolyte | Substrate    | Overpotential (10 mA cm <sup>-2</sup> ) | Tafel slope (mV/dec) | Reference |
|------------------------------------------------------------------------------------|-------------|--------------|-----------------------------------------|----------------------|-----------|
| Co <sub>3</sub> O <sub>4</sub> nanoparticle                                        | 1 M KOH     | GCE          | 350                                     | 84                   | 2         |
| Co <sub>3</sub> O <sub>4</sub> @GF_KMnO <sub>4</sub>                               | 0.1M KOH    | RDE          | 440                                     | 60.3                 | 3         |
| Co <sub>3</sub> O <sub>4</sub> -200                                                | 1 M KOH     | GCE          | 390                                     | 59.2                 | 4         |
| Co <sub>3</sub> O <sub>4</sub> @C                                                  | 1 M KOH     | CP           | 310                                     | 69                   | 5         |
| Co <sub>3</sub> O <sub>4</sub> /LIG                                                | 0.1 KOH     | RRD          | 340                                     | 40                   | 6         |
| NiO <sub>x</sub> /NiCo <sub>2</sub> O <sub>4</sub> /Co <sub>3</sub> O <sub>4</sub> | 1M NaOH     | Nickel sheet | 315                                     | 76                   | 7         |
| Co <sub>3</sub> O <sub>4</sub> nanowires                                           | 1M KOH      | GCE          | 405                                     | 72                   | 8         |
| M-Co <sub>3</sub> O <sub>4</sub>                                                   | 1M KOH      | GCE          | 370                                     | 89                   | 9         |
| rGO-Co <sub>3</sub> O <sub>4</sub>                                                 | 1M KOH      | RDE          | 410                                     | 85                   | 10        |
| Co <sub>3</sub> O <sub>4</sub> /NiCo <sub>2</sub> O <sub>4</sub>                   | 1M KOH      | NF           | 340                                     | 88                   | 11        |
| Porous Co <sub>3</sub> O <sub>4</sub>                                              | 1M KOH      | RDE          | 368                                     | 59                   | 12        |
| Co <sub>3</sub> O <sub>4</sub> nanocubes                                           | 1M KOH      | GCE          | 402                                     | 67                   | 13        |
| Co <sub>3</sub> O <sub>4</sub> -C                                                  | 1M KOH      | NF           | 310                                     | 90                   | 14        |
| Ultrathin Co <sub>3</sub> O <sub>4</sub>                                           | 1M KOH      | RDE          | 307                                     | 76                   | 15        |
| NiO-400                                                                            | 1M NaOH     | SS           | 530                                     | 136.7                | 16        |
| Ni-C <sub>500-20</sub>                                                             | 1M KOH      | CP           | 353                                     | 97                   | 17        |
| Ni/NiO@rGO                                                                         | 0.5M KOH    | GCE          | 480                                     | 41                   | 18        |

|                                           |               |     |            |           |                  |
|-------------------------------------------|---------------|-----|------------|-----------|------------------|
| NiO-300                                   | 1M KOH        | GCE | 370        | 156       | 19               |
| NiO/NiS                                   | 1M KOH        | NF  | 209        | 60        | 20               |
| NiCoON/NF                                 | 1M KOH        | NF  | 247        | 35        | 21               |
| Ni <sub>4</sub> (PET) <sub>8</sub>        | 1M KOH        | GCE | 280        | 60        | 22               |
| Coo-Cal                                   | 1M KOH        | GCE | 306        | 67        | 23               |
| <b>Co<sub>3</sub>O<sub>4</sub>-NiO/NF</b> | <b>1M KOH</b> |     | <b>311</b> | <b>90</b> | <b>This work</b> |

**Table S4** Comparative table of electrochemical properties of recently reported Co<sub>3</sub>O<sub>4</sub> and NiO based electrocatalyst.

### **S6.5. ECSA normalized LSV curve of Co<sub>3</sub>O<sub>4</sub>-NiO/NF**

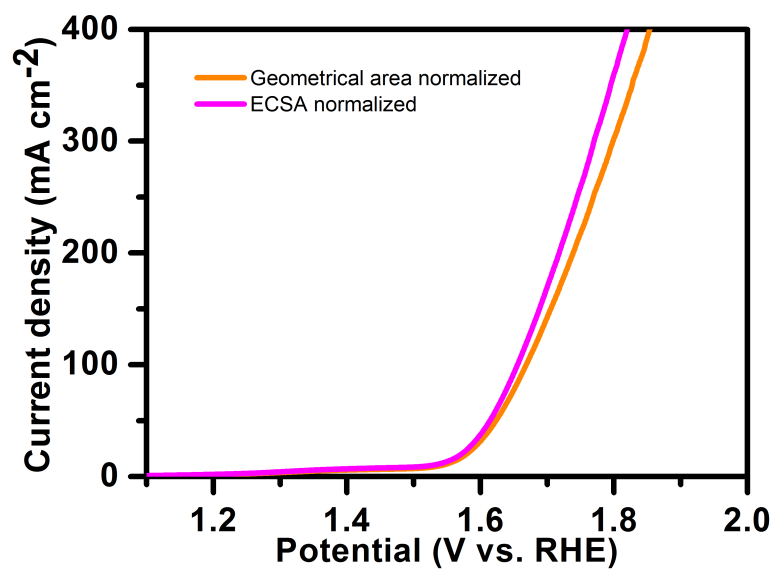

**Figure S11** Geometrical area normalized and ECSA normalized OER activity of  $\text{Co}_3\text{O}_4$ -NiO/NF catalyst

### S6.6. Cyclic voltammometry curve of $\text{Co}_3\text{O}_4\text{-NiO}$ , $\text{Co}_3\text{O}_4$ and $\text{NiO}$

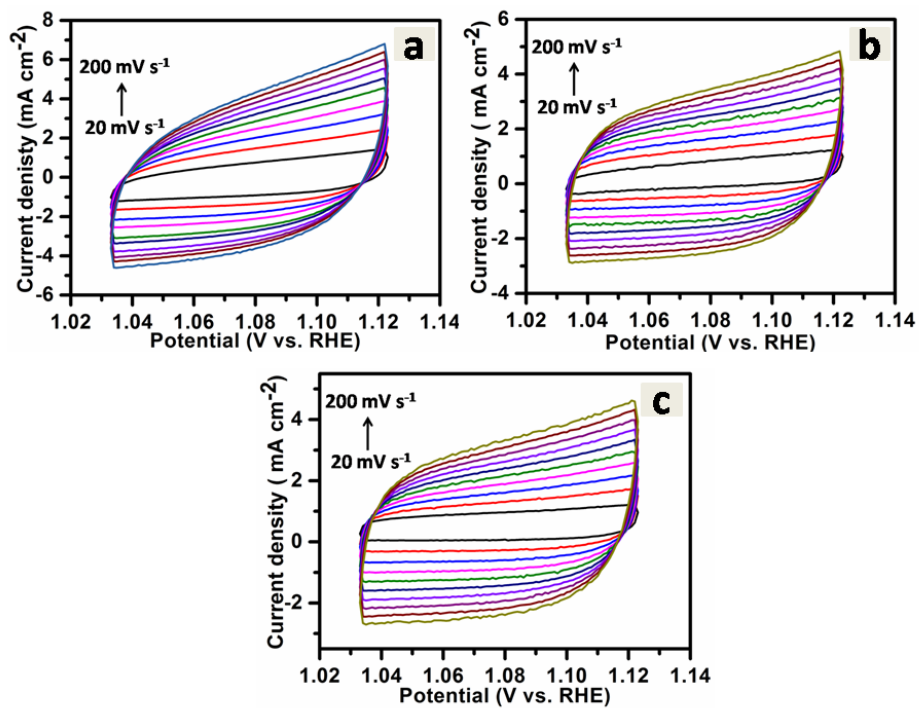

**Figure S12** Cyclic voltammometry curve of (a)  $\text{Co}_3\text{O}_4\text{-NiO/NF}$ , (b)  $\text{Co}_3\text{O}_4/\text{NF}$  and (c)  $\text{NiO/NF}$  for the calculation of  $C_{dl}$

### S6.7.PXRD spectra of the catalyst after durability test

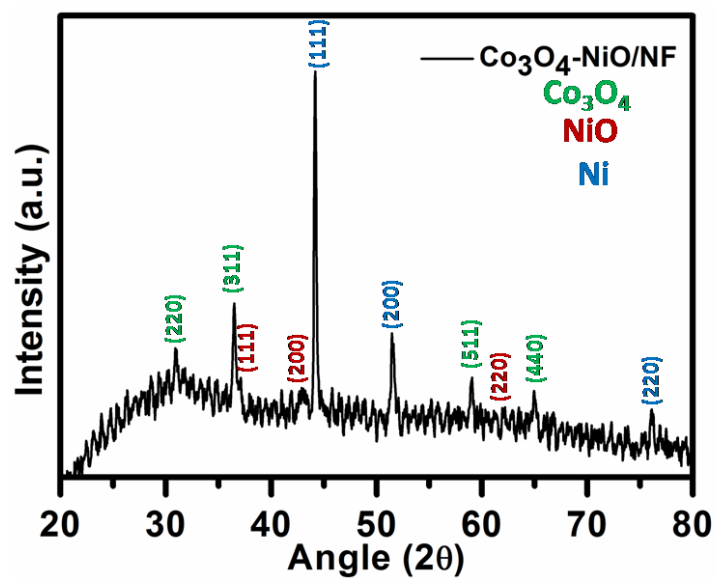

Figure S13 PXRD spectra of the catalyst after stability showing the retention of all the phases present

### S6.8. HRTEM analysis of catalyst after durability test

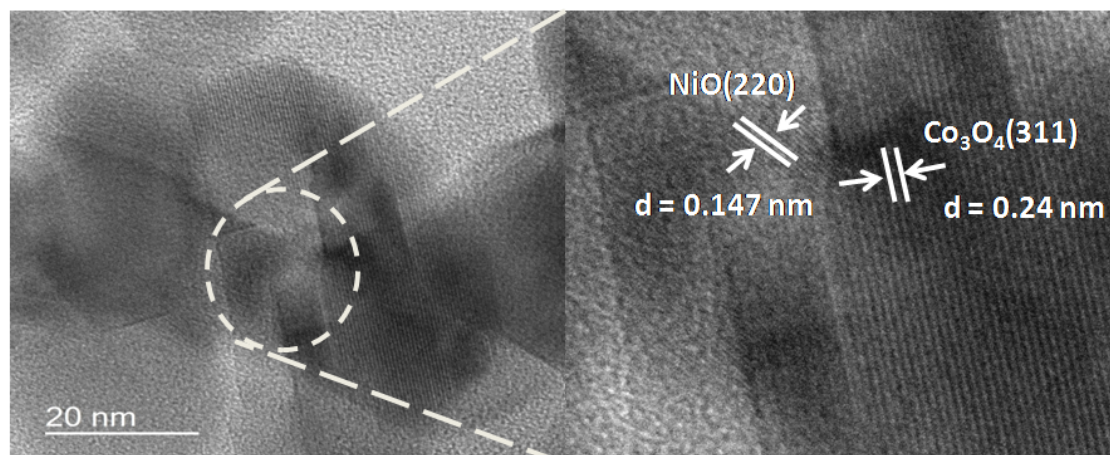

**Figure S14** HRTEM analysis of the catalyst after stability



### S6.9. STEM elemental mapping of catalyst after durability test

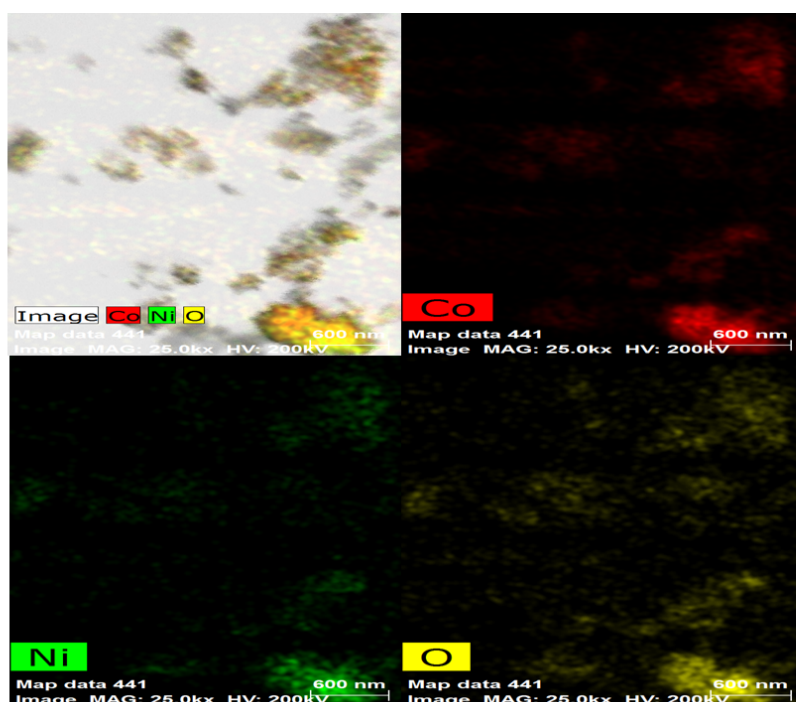

**Figure S15.**STEM elemental mapping of the catalyst showing the presence of all the elements after stability also

### S6.10. STEM elemental mapping of catalyst after durability test

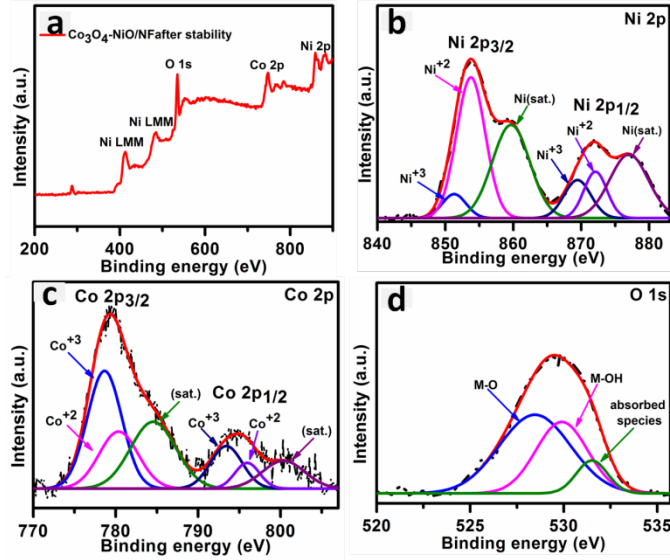

**Figure S16** XPS of the  $\text{Co}_3\text{O}_4\text{-NiO/NF}$  catalyst after stability (a) survey spectrum of catalyst . HR spectra of (b) Ni 2p, (c) Co 2p and (d) O 1s electron: experimental data (dotted curve) and fitting results (solid curve). The peaks are assigned by oxidation states of different elements with their splitting term

## S7 Theoretical details

Density functional theory has been used to simulate theoretical models to observe the different active sites for  $\text{O}^*$  and  $\text{OH}^*$  adsorption on the  $\text{Co}_3\text{O}_4\text{-NiO/NF}$  heterostructure. Here, we present the detailed steps to understand the OER mechanism , which is a four electron transfer process.

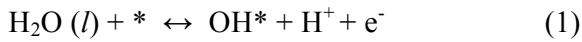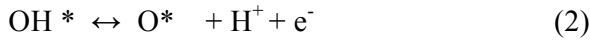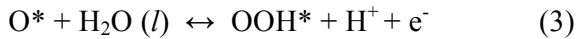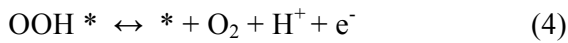

where  $*$  stands for an active site on the surface of heterostructure.  $\text{O}^*$ ,  $\text{OH}^*$  and  $\text{OOH}^*$  are adsorbed intermediates. Gibbs energy determines whether a process will be spontaneous or not. For each step, Gibbs energy can be calculated as

$$\begin{aligned}\Delta G_1 &= \Delta G(\text{OH}^*) - \Delta G(\text{H}_2\text{O}) + \text{KTln}a_{\text{H}^+} - eU \\ &= E(\text{OH}^*) - E(^*) - [\text{E}(\text{H}_2\text{O}) - 1/2\text{E}(\text{H}_2)] + \Delta\text{ZPE} - T\Delta S + \text{KTln}a_{\text{H}^+} - eU\end{aligned}\quad (5)$$

$$\begin{aligned}\Delta G_2 &= \Delta G(\text{O}^*) - \Delta G(\text{OH}^*) + \text{KTln}a_{\text{H}^+} - eU \\ &= E(\text{O}^*) - E(\text{OH}^*) + 1/2\text{E}(\text{H}_2) + \Delta\text{ZPE} - T\Delta S + \text{KTln}a_{\text{H}^+} - eU\end{aligned}\quad (6)$$

$$\begin{aligned}\Delta G_3 &= \Delta G(\text{OOH}^*) - \Delta G(\text{O}^*) + \text{KTln}a_{\text{H}^+} - eU \\ &= E(\text{OOH}^*) - E(\text{O}^*) - [\text{E}(\text{H}_2\text{O}) - 1/2\text{E}(\text{H}_2)] + \Delta\text{ZPE} - T\Delta S + \text{KTln}a_{\text{H}^+} - eU\end{aligned}\quad (7)$$

$$\begin{aligned}\Delta G_4 &= \Delta G(^*) + \Delta G(\text{O}_2) - \Delta G(\text{OOH}^*) + \text{KTln}a_{\text{H}^+} - eU \\ &= E(^*) - E(\text{OOH}^*) + 4.92 + [2\text{E}(\text{H}_2\text{O}) - 1/2\text{E}(\text{H}_2)] + \Delta\text{ZPE} - T\Delta S + \text{KTln}a_{\text{H}^+} - eU\end{aligned}\quad (8)$$

Here,  $K$  is Boltzmann constant,  $a_{\text{H}^+}$  represents the activity of protons,  $U$  is the potential at the electrode and  $e$  is the charge transferred. At standard conditions(  $\text{pH}= 14$ ,  $T=298.15$  K) and  $U = 1.23$ , Gibbs energies reduce to

$$\begin{aligned}\Delta G_1 &= \Delta G(\text{OH}^*) - \Delta G(\text{H}_2\text{O}) \\ &= E(\text{OH}^*) - E(^*) - [\text{E}(\text{H}_2\text{O}) - 1/2\text{E}(\text{H}_2)] + \Delta\text{ZPE} - T\Delta S\end{aligned}\quad (9)$$

$$\begin{aligned}\Delta G_2 &= \Delta G(\text{O}^*) - \Delta G(\text{OH}^*) \\ &= E(\text{O}^*) - E(\text{OH}^*) + 1/2\text{E}(\text{H}_2) + \Delta\text{ZPE} - T\Delta S\end{aligned}\quad (10)$$

There exists a universal scaling relationship between  $\text{OH}^*$  and  $\text{OOH}^*$ , that is

$$E_{\text{ads}}(\text{OOH}^*) = E_{\text{ads}}(\text{OH}^*) + 3.2 \text{ [1]}$$

This means the energy difference between  $\text{OH}^*$  and  $\text{OOH}^*$  is constant and hence, independent of the binding strength to the surface. In terms of free energy, the scaling relationship becomes

$$\Delta G_3 = -\Delta G_2 + 3.2 \text{ [1]}\quad (11)$$

The process of electrolysis :  $\text{H}_2\text{O} (l) \rightarrow 1/2\text{O}_2 (g) + \text{H}_2(g)$  requires potential of 4.92 eV. As this process involves 4 steps, the potential required for charge transfer is same for each step and equals to 1.23 eV.

Therefore, Gibbs energy for 4th step can be calculated as

$$\Delta G_4 = 4.92 - (\Delta G_1 + \Delta G_2 + \Delta G_3) \quad (12)$$

Also,  $\Delta ZPE - T\Delta S$  is unknown for the adsorption on  $\text{O}^*$  and  $\text{OH}^*$  on the heterostructure and therefore, assumed to be zero.  $E(^*)$ ,  $E(\text{O}^*)$ ,  $E(\text{OH}^*)$ ,  $E(\text{H}_2\text{O})$ ,  $E(\text{H}_2)$  are the energies calculated using DFT. The calculated adsorption energies of  $\text{O}^*$  and  $\text{OH}^*$  on different surfaces/sites are reported in Table.S1.

**Table S5. Enthalpies of adsorbates participating in the OER process**

| Surface              | Total Energy (in eV) |
|----------------------|----------------------|
| $\text{H}_2\text{O}$ | -14.876580475        |
| $\text{H}_2$         | -6.88852316          |
| H                    | -3.44426158          |
| $\text{O}_2$         | -9.27246678          |
| H                    | -4.63623339          |
| OH                   | -7.08922806          |

**Table S6. Adsorption energies at different sites**

| S. No. | Surface                                          | Total energy (eV) |
|--------|--------------------------------------------------|-------------------|
| 1.     | $\text{Co}_3\text{O}_4\text{-NiO+O}$ (Ni-site)   | -725.68981        |
| 2.     | $\text{Co}_3\text{O}_4\text{-NiO+O}$ (Co-site)   | -725.7282         |
| 3.     | $\text{Co}_3\text{O}_4\text{-NiO+OH}$ (Ni-site)  | -730.49719        |
| 4.     | $\text{Co}_3\text{O}_4\text{-NiO+OH}$ (Co-site)  | -730.23927        |
| 5.     | $\text{Co}_3\text{O}_4\text{-NiO+OOH}$ (Ni-site) | -733.50533        |
| 6.     | $\text{Co}_3\text{O}_4\text{-NiO+OOH}$ (Co-site) | -733.58578        |

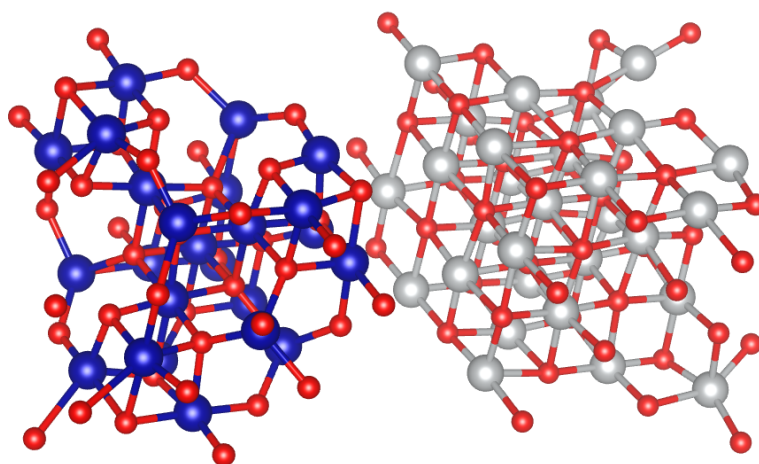

$\text{Co}_3\text{O}_4\text{NiO}$

**Figure S17.** Structure of both the individual phases forming heterojunction

## References

1. Xue, Z., Liu, K., Liu, Q., Li, Y., Li, M., Su, C.Y., Ogiwara, N., Kobayashi, H., Kitagawa, H., Liu, M. and Li, G., 2019. Missing-linker metal-organic frameworks for oxygen evolution reaction. *Nature communications*, *10*(1), pp.1-8.
2. Liu, S.X., Zhang, R., Lv, W.X., Kong, F.Y. and Wang, W., 2018. Controlled synthesis of  $\text{Co}_3\text{O}_4$  electrocatalysts with different morphologies and their application for oxygen evolution reaction. *Int. J. Electrochem. Sci.*, *13*(4), pp.3843-3854.
3. Araújo, M.P., Nunes, M., Rocha, I.M., Pereira, M.F.R. and Freire, C., 2018.  $\text{Co}_3\text{O}_4$  nanoparticles anchored on selectively oxidized graphene flakes as bifunctional electrocatalysts for oxygen reactions. *ChemistrySelect*, *3*(35), pp.10064-10076.
4. Tan, P., Wu, Z., Chen, B., Xu, H., Cai, W. and Ni, M., 2019. Exploring oxygen electrocatalytic activity and pseudocapacitive behavior of  $\text{Co}_3\text{O}_4$  nanoplates in alkaline solutions. *Electrochimica Acta*, *310*, pp.86-95.
5. Yang, X., Li, H., Lu, A.Y., Min, S., Idriss, Z., Hedhili, M.N., Huang, K.W., Idriss, H. and Li, L.J., 2016. Highly acid-durable carbon coated  $\text{Co}_3\text{O}_4$  nanoarrays as efficient oxygen evolution electrocatalysts. *Nano Energy*, *25*, pp.42-50.
6. Ren, M., Zhang, J. and Tour, J.M., 2018. Laser-induced graphene synthesis of  $\text{Co}_3\text{O}_4$  in graphene for oxygen electrocatalysis and metal-air batteries. *Carbon*, *139*, pp.880-887.

7. Chen, J., Ling, Y., Lu, Z., Huai, X., Qin, F. and Zhang, Z., 2019. Sandwich-like NiO<sub>x</sub>/NiCo<sub>2</sub>O<sub>4</sub>/Co<sub>3</sub>O<sub>4</sub> nanoflakes enable efficient oxygen evolution electrocatalysis. *Electrochimica Acta*, 322, p.134753.
8. Wang, Y., Zhou, T., Jiang, K., Da, P., Peng, Z., Tang, J., Kong, B., Cai, W.B., Yang, Z. and Zheng, G., 2014. Reduced mesoporous Co<sub>3</sub>O<sub>4</sub> nanowires as efficient water oxidation electrocatalysts and supercapacitor electrodes. *Advanced Energy Materials*, 4(16), p.1400696.
9. Sun, H., Zhao, Y., Mølhave, K., Zhang, M. and Zhang, J., 2017. Simultaneous modulation of surface composition, oxygen vacancies and assembly in hierarchical Co<sub>3</sub>O<sub>4</sub> mesoporous nanostructures for lithium storage and electrocatalytic oxygen evolution. *Nanoscale*, 9(38), pp.14431-14441.
10. Wu, Z., Sun, L.P., Yang, M., Huo, L.H., Zhao, H. and Grenier, J.C., 2016. Facile synthesis and excellent electrochemical performance of reduced graphene oxide–Co<sub>3</sub>O<sub>4</sub> yolk-shell nanocages as a catalyst for oxygen evolution reaction. *Journal of Materials Chemistry A*, 4(35), pp.13534-13542.
11. Hu, H., Guan, B., Xia, B. and Lou, X.W., 2015. Designed formation of Co<sub>3</sub>O<sub>4</sub>/NiCo<sub>2</sub>O<sub>4</sub> double-shelled nanocages with enhanced pseudocapacitive and electrocatalytic properties. *Journal of the American Chemical Society*, 137(16), pp.5590-5595.
12. Li, Z., Yu, X.Y. and Paik, U., 2016. Facile preparation of porous Co<sub>3</sub>O<sub>4</sub> nanosheets for high-performance lithium ion batteries and oxygen evolution reaction. *Journal of Power Sources*, 310, pp.41-46.
13. Zhang, P., Han, X., Hu, H., Gui, J., Li, M. and Qiu, J., 2017. In-situ growth of highly uniform and single crystalline Co<sub>3</sub>O<sub>4</sub> nanocubes on graphene for efficient oxygen evolution. *Catalysis Communications*, 88, pp.81-84.
14. Ren, J.T., Yuan, G.G., Weng, C.C. and Yuan, Z.Y., 2018. Rationally designed Co<sub>3</sub>O<sub>4</sub>–C nanowire arrays on Ni foam derived from metal organic framework as reversible oxygen evolution electrodes with enhanced performance for Zn–air batteries. *ACS Sustainable Chemistry & Engineering*, 6(1), pp.707-718.
15. Li, Y., Li, F.M., Meng, X.Y., Li, S.N., Zeng, J.H. and Chen, Y., 2018. Ultrathin Co<sub>3</sub>O<sub>4</sub> nanomeshes for the oxygen evolution reaction. *Acs Catalysis*, 8(3), pp.1913-1920.
16. Basharat, F., Rana, U.A., Shahid, M. and Serwar, M., 2015. Heat treatment of electrodeposited NiO films for improved catalytic water oxidation. *RSC advances*, 5(105), pp.86713-86722.
17. Li, Y., Huang, J., Rao, G., Wu, C., Du, X., Sun, Y., Wang, X. and Yang, C., 2020. Enhanced water oxidation activity of 3D porous carbon by incorporation of heterogeneous Ni/NiO nanoparticles. *Applied Surface Science*, 530, p.147192.
18. Narwade, S.S., Mali, S.M., Digraskar, R.V., Sapner, V.S. and Sathe, B.R., 2019. Ni/NiO@ rGO as an efficient bifunctional electrocatalyst for enhanced overall water splitting reactions. *International Journal of Hydrogen Energy*, 44(49), pp.27001-27009.

19. Mondal, A., Paul, A., Srivastava, D.N. and Panda, A.B., 2018. NiO hollow microspheres as efficient bifunctional electrocatalysts for overall water-splitting. *International Journal of Hydrogen Energy*, 43(47), pp.21665-21674.
20. Khan, N.A., Rashid, N., Junaid, M., Zafar, M.N., Faheem, M. and Ahmad, I., 2019. NiO/NiS heterostructures: an efficient and stable electrocatalyst for oxygen evolution reaction. *ACS Applied Energy Materials*, 2(5), pp.3587-3594.
21. Li, Y., Hu, L., Zheng, W., Peng, X., Liu, M., Chu, P.K. and Lee, L.Y.S., 2018. Ni/Co-based nanosheet arrays for efficient oxygen evolution reaction. *Nano Energy*, 52, pp.360-368.
22. Joya, K.S., Sinatra, L., AbdulHalim, L.G., Joshi, C.P., Hedhili, M.N., Bakr, O.M. and Hussain, I., 2016. Atomically monodisperse nickel nanoclusters as highly active electrocatalysts for water oxidation. *Nanoscale*, 8(18), pp.9695-9703.
23. Xu, W., Lyu, F., Bai, Y., Gao, A., Feng, J., Cai, Z. and Yin, Y., 2018. Porous cobalt oxide nanoplates enriched with oxygen vacancies for oxygen evolution reaction. *Nano Energy*, 43, pp.110-116.
